# Supplementary material for: Novel pharmaceutical salts of cephalexin with organic counterions: structural analysis and properties
Source: Royal Society of Chemistry journal article supplement (doi:10.1039/d2ra05565a), 2022-01-01
Supplement: d2ra05565a1.pdf [file d2ra05565a1.pdf]

## Electronic Supplementary Information

### Novel Pharmaceutical Salts of Cephalexin with Organic Counterions: Structural Analysis and Properties

Xiu-Ni Hua,<sup>\*a</sup> Xia Pan,<sup>a</sup> Yang Zhu,<sup>a,b</sup> Zhuoer Cai,<sup>b</sup> Qi Song,<sup>a</sup> Yaozhenhui Li,<sup>a</sup> Wenbin Feng,<sup>a</sup> Xin Chen,<sup>a</sup> Hui Zhang<sup>\*a</sup> and Baiwang Sun<sup>\*b</sup>

<sup>a</sup> School of Environmental Science, Nanjing Xiaozhuang University, Nanjing 211171, P. R. China

E-mail: huaxiuni@njxzc.edu.cn

<sup>b</sup> School of Chemistry and Chemical Engineering, Southeast University, Nanjing 211189, P. R. China

E-mail: chmsunbw@seu.edu.cn

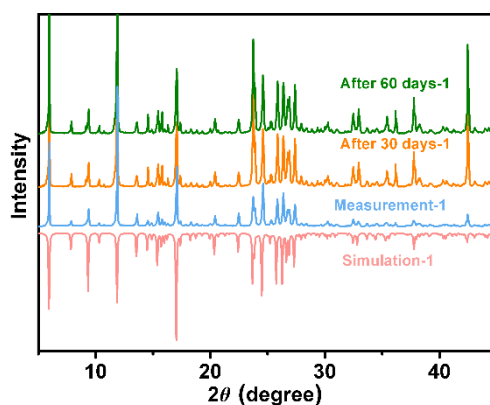

**Fig. S1** The measured PXRD patterns of salt **1** match well with the simulated ones based on the corresponding crystal structure. And salt **1** show good physical stability when it was placed for 30 and 60 days under the conditions of ambient temperature and pressure.

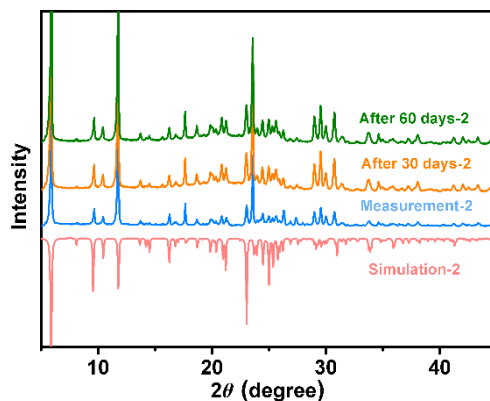

**Fig. S2** The measured PXRD patterns of salt **2** at 293 K match well with the simulated ones based on the crystal structure collected at 150 K. And salt **2** show good physical stability when it was placed for 30 and 60 days under the conditions of ambient temperature and pressure.

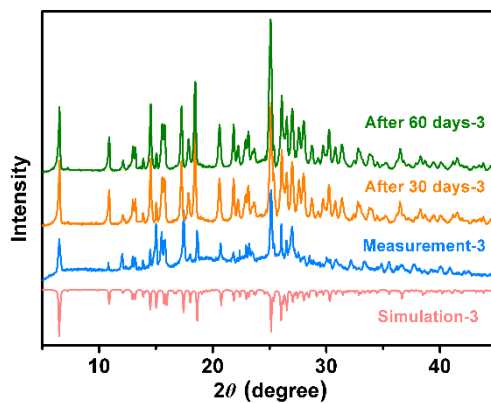

**Fig. S3** The measured PXRD patterns of salt **3** at 293 K match well with the simulated ones based on the crystal structure collected at 150 K. And salt **3** show good physical stability when it was placed for 30 and 60 days under the conditions of ambient temperature and pressure.

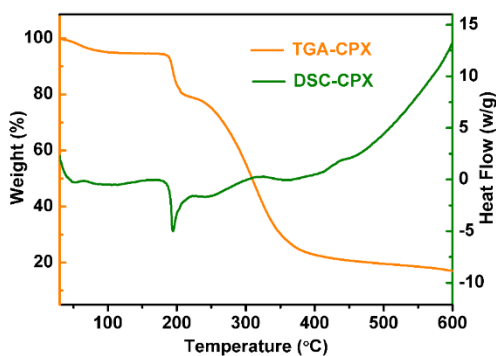

**Fig. S4** TGA-DSC curve of CPX.

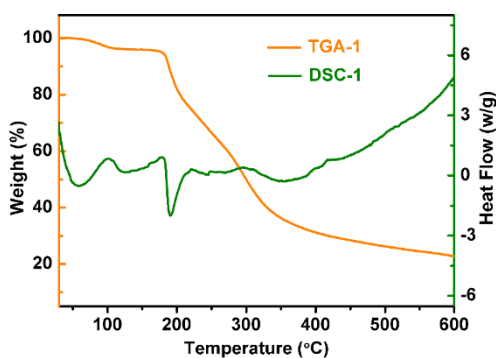

**Fig. S5** TGA-DSC curve of salt **1**.

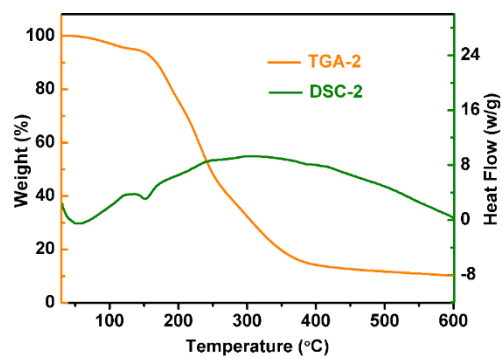

**Fig. S6** TGA-DSC curve of salt 2.

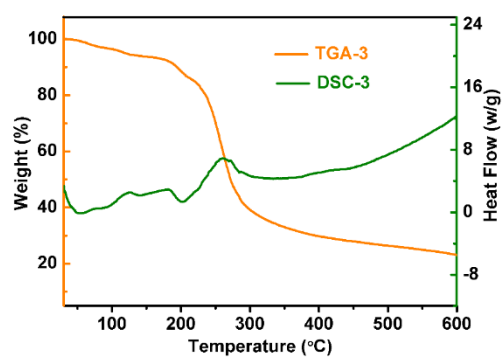

**Fig. S7** TGA-DSC curve of salt 3.

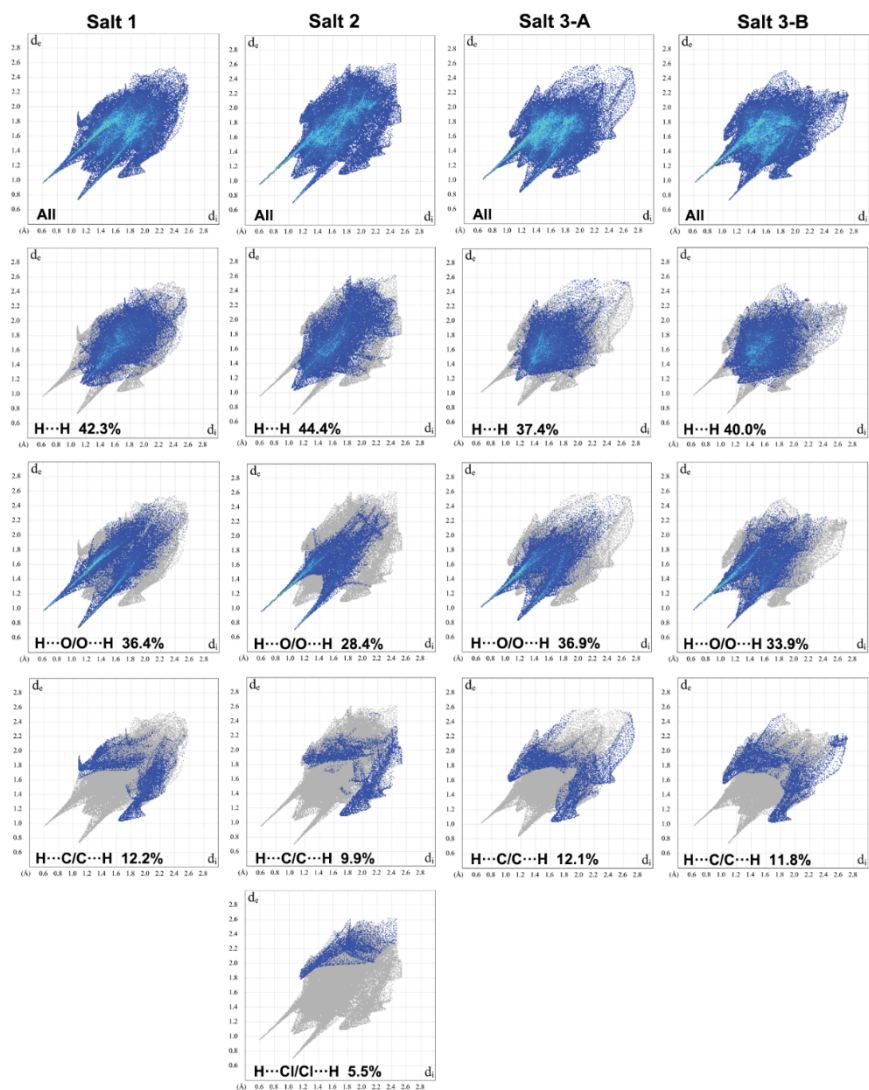

**Fig. S8** 2D fingerprint plots according to the  $d_{\text{norm}}$  value about different intermolecular contacts of CPX cations in salts 1–3. Two CPX cations in the asymmetric unit of salt 3 were investigated individually and recorded as salt 3-A and salt 3-B, respectively.

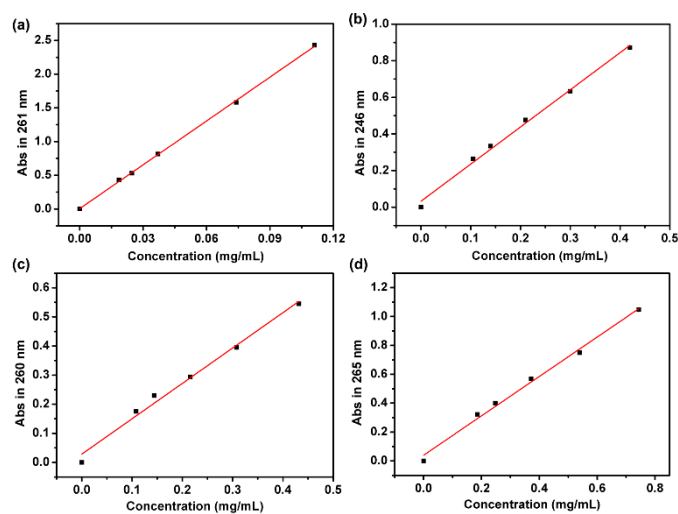

**Fig. S9** Absorption calibration curves of (a) CPX, (b) salt **1**, (c) salt **2** and (d) salt **3**.

**Table S1** Hydrogen bond distances [Å] and angles [°] in salts **1**

| Compound                                      | D–H...A [Å]                              | D–H [Å] | H...A [Å] | D...A [Å] | D–H...A [°] |
|-----------------------------------------------|------------------------------------------|---------|-----------|-----------|-------------|
| CPX·DHBA·H <sub>2</sub> O<br>(Salt <b>1</b> ) | O1–H1...O9 <sup>i</sup>                  | 0.82    | 1.74      | 2.564(4)  | 179.3       |
|                                               | O7–H7...O5 <sup>v</sup>                  | 0.82    | 1.80      | 2.518(4)  | 145.3       |
|                                               | O8–H8...O6 <sup>v</sup>                  | 0.82    | 1.84      | 2.558(4)  | 145.3       |
|                                               | O9–H9A...O5 <sup>v</sup>                 | 0.94    | 1.85      | 2.664(4)  | 143.0       |
|                                               | O9–H9B...O3 <sup>ii</sup>                | 0.86    | 2.07      | 2.904(4)  | 162.2       |
|                                               | N1 <sup>+</sup> –H1A...O6 <sup>iii</sup> | 0.89    | 1.81      | 2.671(4)  | 162.8       |
|                                               | N1 <sup>+</sup> –H1B...O2 <sup>iv</sup>  | 0.89    | 1.93      | 2.708(4)  | 144.8       |
|                                               | N1 <sup>+</sup> –H1C...O1 <sup>v</sup>   | 0.89    | 2.30      | 3.068(4)  | 145.2       |

Symmetry codes: (i): x+1, y, z; (ii): -x+1, y-1/2, -z+1; (iii): -x, y+1/2, -z+1; (iv): -x+1, y+1/2, -z+1; (v): x-1, y, z

**Table S2** Hydrogen bond distances [Å] and angles [°] in salts **2**

| Compound                                         | D–H...A [Å]                             | D–H [Å] | H...A [Å] | D...A [Å] | D–H...A [°] |
|--------------------------------------------------|-----------------------------------------|---------|-----------|-----------|-------------|
| CPX·CSA·<br>1.5H <sub>2</sub> O (Salt <b>2</b> ) | O2–H2...O8                              | 0.84    | 1.70      | 2.527(4)  | 168.7       |
|                                                  | O5–H5...O6 <sup>v</sup>                 | 0.84    | 1.76      | 2.511(4)  | 147.9       |
|                                                  | O8–H8A...O4 <sup>i</sup>                | 0.91    | 1.89      | 2.724(4)  | 151.0       |
|                                                  | O8–H8B...O6 <sup>ii</sup>               | 0.94    | 1.75      | 2.686(4)  | 173.6       |
|                                                  | O9–H9A...O7 <sup>v</sup>                | 0.79    | 1.97      | 2.753(4)  | 176.2       |
|                                                  | N2–H2A...O7 <sup>iii</sup>              | 0.88    | 1.93      | 2.809(4)  | 177.2       |
|                                                  | N3 <sup>+</sup> –H3A...O1 <sup>iv</sup> | 0.91    | 1.98      | 2.852(4)  | 159.8       |
|                                                  | N3 <sup>+</sup> –H3B...O5 <sup>v</sup>  | 0.91    | 1.92      | 2.803(4)  | 163.4       |
|                                                  | N3 <sup>+</sup> –H3C...O3 <sup>v</sup>  | 0.91    | 1.89      | 2.794(4)  | 175.1       |

Symmetry codes: (i) x, y, z+1; (ii) x, y+1, z; (iii) -x+1, y, -z+1; (iv) x, y, z-1; (v) -x+1, y, -z

**Table S3** Hydrogen bond distances [Å] and angles [°] in salts **3**

| Compound                                       | D–H...A [Å]                              | D–H [Å] | H...A [Å] | D...A [Å] | D–H...A [°] |
|------------------------------------------------|------------------------------------------|---------|-----------|-----------|-------------|
| CPX·SSA·<br>4H <sub>2</sub> O (Salt <b>3</b> ) | N2–H2A...O5                              | 0.88    | 2.30      | 3.063(6)  | 144.4       |
|                                                | N3 <sup>+</sup> –H3A...O24 <sup>i</sup>  | 0.91    | 1.98      | 2.858(6)  | 162.8       |
|                                                | N3 <sup>+</sup> –H3B...O23 <sup>ii</sup> | 0.91    | 1.93      | 2.762(6)  | 151.6       |
|                                                | N3 <sup>+</sup> –H3B...O25 <sup>ii</sup> | 0.91    | 2.59      | 3.046(6)  | 112.1       |
|                                                | N3 <sup>+</sup> –H3C...O2 <sup>iii</sup> | 0.91    | 2.06      | 2.789(5)  | 135.9       |
|                                                | N5–H5D...O15                             | 0.88    | 2.10      | 2.922(5)  | 154.4       |
|                                                | N6 <sup>+</sup> –H6A...O27 <sup>iv</sup> | 0.91    | 1.91      | 2.797(6)  | 165.3       |
|                                                | N6 <sup>+</sup> –H6B...O28 <sup>v</sup>  | 0.91    | 1.95      | 2.857(6)  | 175.4       |
|                                                | N6 <sup>+</sup> –H6C...O12 <sup>v</sup>  | 0.91    | 2.18      | 2.851(5)  | 130.3       |
|                                                | N6 <sup>+</sup> –H6C...O22 <sup>iv</sup> | 0.91    | 2.26      | 2.969(5)  | 134.7       |
|                                                | O1–H1...O26 <sup>vi</sup>                | 0.84    | 1.82      | 2.658(5)  | 174.5       |
|                                                | O5–H5...O6                               | 0.84    | 1.84      | 2.572(5)  | 144.7       |
|                                                | O7–H7...O18                              | 0.84    | 1.81      | 2.642(5)  | 172.3       |

|                             |      |      |          |       |
|-----------------------------|------|------|----------|-------|
| O11–H11…O22 <sup>vii</sup>  | 0.84 | 1.78 | 2.618(5) | 176.8 |
| O15–H15A…O16                | 0.84 | 1.77 | 2.497(6) | 144.3 |
| O17–H17…O21                 | 0.84 | 1.71 | 2.552(6) | 177.4 |
| O21–H21A…O14 <sup>v</sup>   | 0.82 | 1.99 | 2.808(6) | 173.5 |
| O21–H21B…O9                 | 1.02 | 1.88 | 2.746(6) | 141.0 |
| O22–H22A…O8 <sup>viii</sup> | 0.94 | 2.02 | 2.915(6) | 160.5 |
| O22–H22B…O9                 | 1.01 | 1.78 | 2.770(6) | 165.6 |
| O23–H23A…O8                 | 0.85 | 2.06 | 2.900(6) | 170.0 |
| O23–H23B…O28                | 1.07 | 2.04 | 2.902(6) | 135.9 |
| O24–H24A…O10                | 0.97 | 1.81 | 2.760(6) | 168.2 |
| O24–H24B…O25                | 0.70 | 2.17 | 2.861(6) | 169.4 |
| O25–H25A…O18 <sup>ix</sup>  | 0.79 | 2.15 | 2.939(5) | 174.0 |
| O25–H25B…O4 <sup>ii</sup>   | 0.89 | 2.12 | 2.868(5) | 141.2 |
| O26–H26A…O19 <sup>x</sup>   | 0.78 | 2.10 | 2.876(6) | 177.5 |
| O26–H26B…O20 <sup>ix</sup>  | 0.77 | 2.12 | 2.893(6) | 178.5 |
| O27–H27C…O20 <sup>ix</sup>  | 0.93 | 1.94 | 2.820(5) | 155.4 |
| O27–H27D…O24                | 0.79 | 1.95 | 2.738(5) | 170.2 |
| O28–H28D…O27                | 0.79 | 2.18 | 2.903(6) | 152.3 |
| O28–H28E…O19 <sup>ix</sup>  | 0.72 | 2.15 | 2.865(6) | 167.0 |

Symmetry codes: (i)  $-x+1, y-1/2, -z+2$ ; (ii)  $-x+1, y+1/2, -z+2$ ; (iii)  $-x+2, y+1/2, -z+2$ ; (iv)  $-x+1, y-1/2, -z+1$ ; (v)  $-x+1, y+1/2, -z+1$ ; (vi)  $x+1, y-1, z$ ; (vii)  $x, y-1, z$ ; (viii)  $x, y+1, z$ ; (ix)  $x-1, y, z$ ; (x)  $x-1, y+1, z$

---
